# Supplementary material
Source: Springer Nature journal article supplement (https://www.springermedizin.de/resource/supplementary/12916_2010_307_MOESM6_ESM.pdf/9599600)

**% Joints at  
Cartilage Grade**

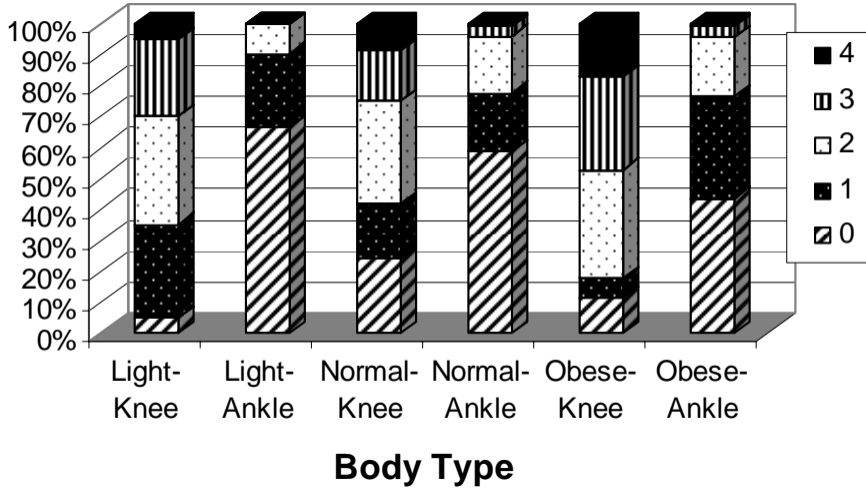

Supplement: MOESM6 [file 9599600]
